# Supplementary material
Source: publisher figshare collection journal article supplement (https://gsajournals.figshare.com/ndownloader/files/28005735)
Supplement: Supplementary file 1 [file 28005735]

**Figure S2 Crossing scheme used to generate genomic deletion strains**

This crossing scheme was used to generate the *Dβ1Δe5* and *Dβ1Δex3* strains. For *Dβ1Δe5,* the F0 sgRNA males were *pCFD4-Dβ1*. For *Dβ1Δe3,* the F0 sgRNA males were *pCFD4-Dβ1-ex3*. All fly strains are described in Tables S1 and S2. Primer sequences are available in Table S3.
